# Supplementary material for: Comparison of the Antioxidant Properties of Green Macroalgae from Diverse European Water Habitats by Use of Several Semi-Quantitative Assays
Source: MDPI journal article supplement (doi:10.3390/molecules27123812), 2022-06-14
Supplement: s1 [file s1]

| Algae                          | Mass of raw material [g] | Mass of extract [g] | Concentration of extract in MeOH [mg/ml] | Volume of extract (added) [μl] | Mean Abs | Mean percent inhibition | mgTE/g extract | mgTE/g raw material |
|--------------------------------|--------------------------|---------------------|------------------------------------------|--------------------------------|----------|-------------------------|----------------|---------------------|
| <i>Cladophora aegagropila</i>  | 14.996                   | 1.026               | 10                                       | 50                             | 0.645    | 11.568                  | 5.344          | 0.366               |
| <i>Cladophora rivularis</i>    | 2.646                    | 0.198               | 10                                       | 50                             | 0.385    | 47.188                  | 16.918         | 1.265               |
| <i>Cladophora glomerata</i>    | 14.922                   | 0.355               | 10                                       | 50                             | 0.396    | 45.725                  | 16.442         | 0.391               |
| <i>Ulva spiralis</i>           | 10.542                   | 1.407               | 10                                       | 50                             | 0.705    | 3.246                   | 2.640          | 0.352               |
| <i>Ulva lactuca</i> ; Sopot    | 0.616                    | 0.042               | 10                                       | 50                             | 0.658    | 9.785                   | 4.765          | 0.322               |
| <i>Ulva lactuca</i> ; Bornholm | 1.026                    | 0.122               | 10                                       | 50                             | 0.667    | 8.505                   | 4.349          | 0.516               |

Figure S1 Results of determination of the content of compounds with antioxidant activity in extracts from algae using ABTS method

| Algae                          | Mass of raw material [g] | Mass of extract [g] | Concentration of extract in MeOH [mg/ml] | Volume of extract (added) [μl] | Mean Abs | mgFe/g extract | mgFe/g raw material |
|--------------------------------|--------------------------|---------------------|------------------------------------------|--------------------------------|----------|----------------|---------------------|
| <i>Cladophora aegagropila</i>  | 14.996                   | 1.026               | 10                                       | 100                            | 0.334    | 1.503          | 0.103               |
| <i>Cladophora rivularis</i>    | 2.646                    | 0.198               | 10                                       | 10                             | 0.083    | 3.580          | 0.268               |
| <i>Cladophora glomerata</i>    | 14.922                   | 0.355               | 10                                       | 100                            | 0.391    | 1.762          | 0.042               |
| <i>Ulva spiralis</i>           | 10.542                   | 1.407               | 10                                       | 100                            | 0.091    | 0.393          | 0.052               |
| <i>Ulva lactuca</i> ; Sopot    | 0.616                    | 0.042               | 10                                       | 100                            | 0.307    | 1.376          | 0.093               |
| <i>Ulva lactuca</i> ; Bornholm | 1.026                    | 0.122               | 10                                       | 100                            | 0.171    | 0.758          | 0.090               |

Figure S2 Results of determination of the content of compounds with antioxidant activity in extracts from algae using the FRAP method

| Algae                          | Mass of raw material [g] | Mass of extract [g] | Concentration of extract in MeOH [mg/ml] | Volume of extract (added) [μl] | Mean Abs | mgGAE/g extract | mgGAE/g raw material |
|--------------------------------|--------------------------|---------------------|------------------------------------------|--------------------------------|----------|-----------------|----------------------|
| <i>Cladophora aegagropila</i>  | 14.996                   | 1.026               | 10                                       | 100                            | 0.352    | 8.953           | 0.613                |
| <i>Cladophora rivularis</i>    | 2.646                    | 0.198               | 10                                       | 50                             | 0.387    | 19.688          | 1.472                |
| <i>Cladophora glomerata</i>    | 14.922                   | 0.355               | 10                                       | 100                            | 0.429    | 10.924          | 0.260                |
| <i>Ulva spiralis</i>           | 10.542                   | 1.407               | 10                                       | 100                            | 0.06     | 1.437           | 0.192                |
| <i>Ulva lactuca</i> ; Sopot    | 0.616                    | 0.042               | 10                                       | 100                            | 0.235    | 5.936           | 0.401                |
| <i>Ulva lactuca</i> ; Bornholm | 1.026                    | 0.122               | 10                                       | 100                            | 0.129    | 3.211           | 0.381                |

Figure S3 Results of determination of the content of polyphenols in extracts from algae using the Folin-Ciocalteu method

| Algae                          | Mass of raw material [g] | Mass of extract [g] | Concentration of extract in MeOH [mg/ml] | Volume of extract (added) [μl] | Mean Abs | mgQ/g extract | mgQ/g raw material |
|--------------------------------|--------------------------|---------------------|------------------------------------------|--------------------------------|----------|---------------|--------------------|
| <i>Cladophora aegagropila</i>  | 14.996                   | 1.026               | 10                                       | 50                             | 0.108    | 8.522         | 0.583              |
| <i>Cladophora rivularis</i>    | 2.646                    | 0.198               | 10                                       | 50                             | 0.580    | 34.518        | 2.581              |
| <i>Cladophora glomerata</i>    | 14.922                   | 0.355               | 10                                       | 50                             | 0.098    | 7.990         | 0.190              |
| <i>Ulva spiralis</i>           | 10.542                   | 1.407               | 10                                       | 50                             | 0.025    | 3.957         | 0.528              |
| <i>Ulva lactuca</i> ; Sopot    | 0.616                    | 0.042               | 10                                       | 50                             | 0.036    | 4.598         | 0.310              |
| <i>Ulva lactuca</i> ; Bornholm | 1.026                    | 0.122               | 10                                       | 50                             | 0.019    | 3.645         | 0.432              |

Figure S4 Results of determination of the content of flavonoids in extracts from algae using the complexometric with  $Al^{3+}$  ions method
